# Supplementary figures and images for: Structural heterogeneity of cellular K5/K14 filaments as revealed by cryo-electron microscopy
Source: eLife journal article supplement (doi:10.7554/elife.70307), 2021-07-29

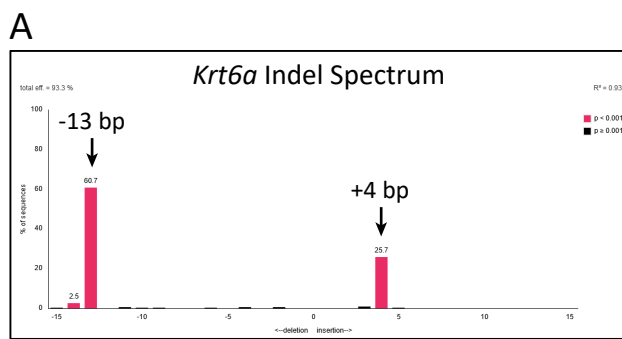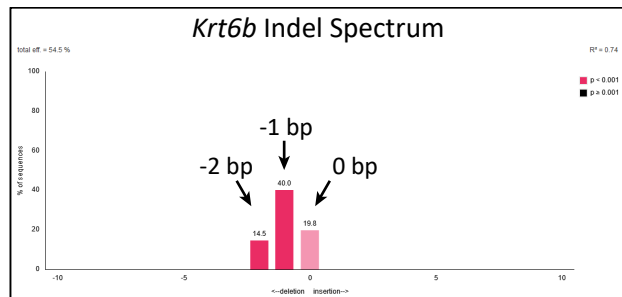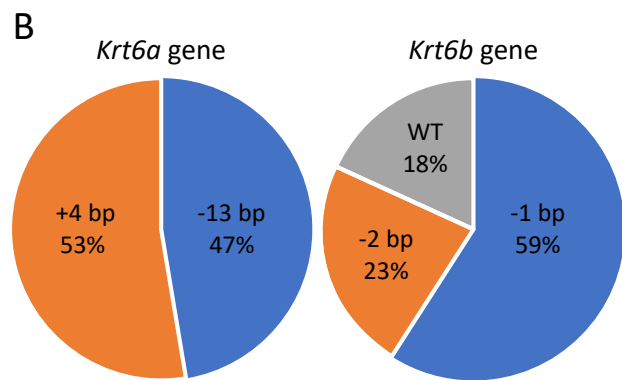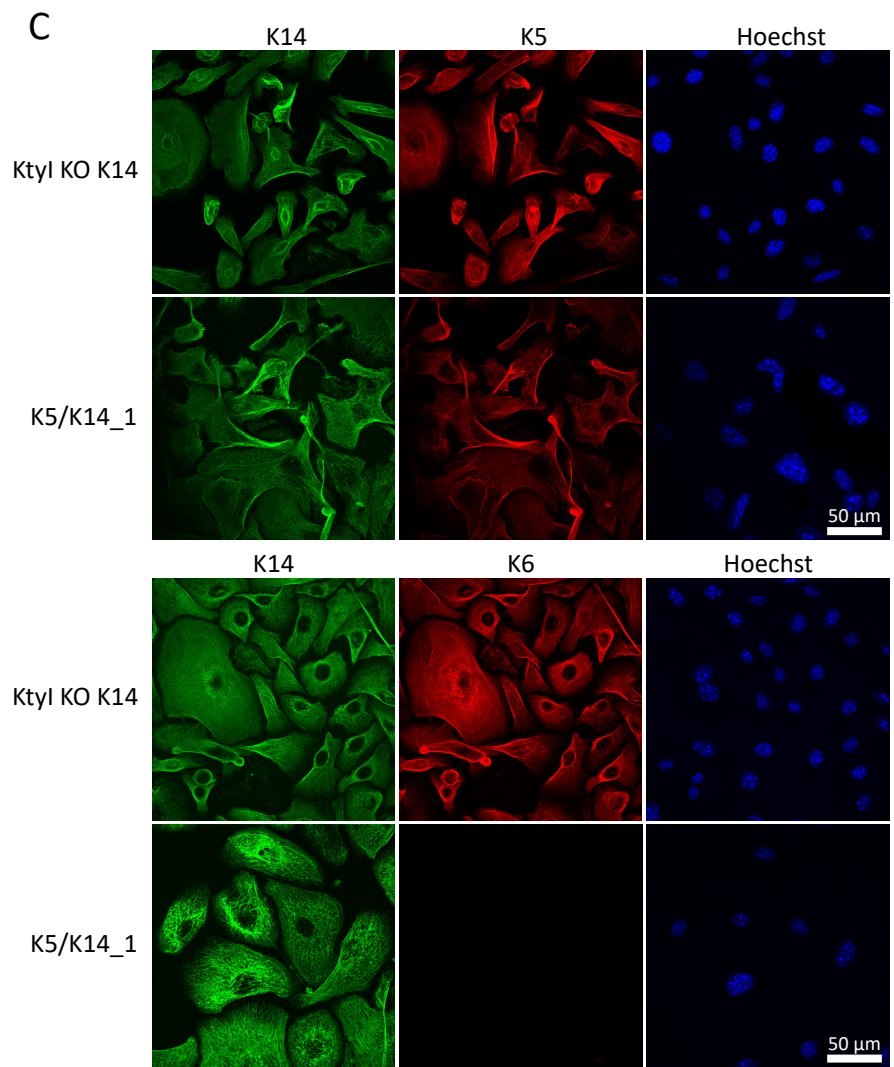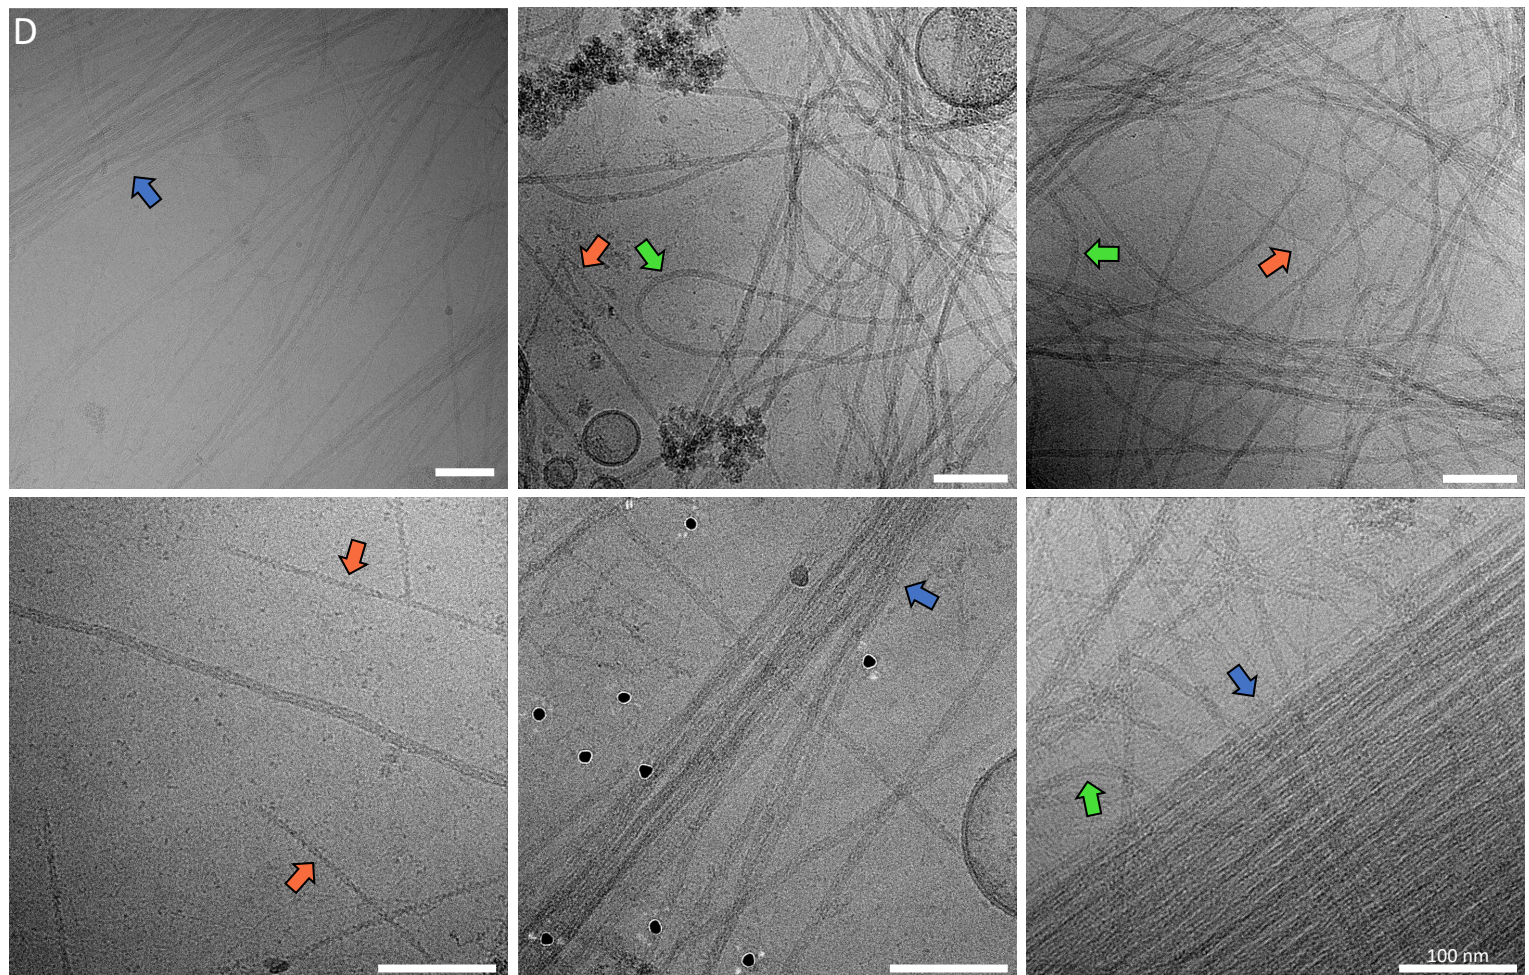

Supplement: supp [file elife_poa_e70307_Figure_1_figure_supplement_1.pdf › elife_poa_e70307_Figure_1_figure_supplement_1.pdf]

**A**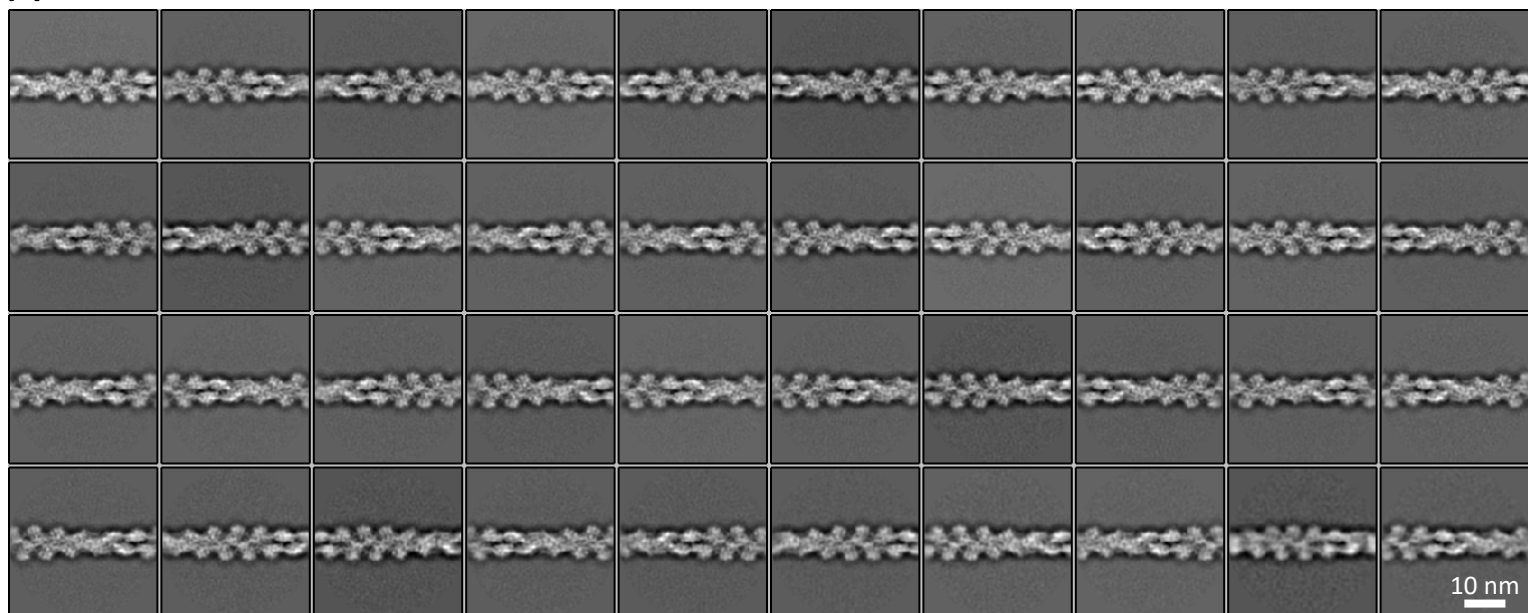**B**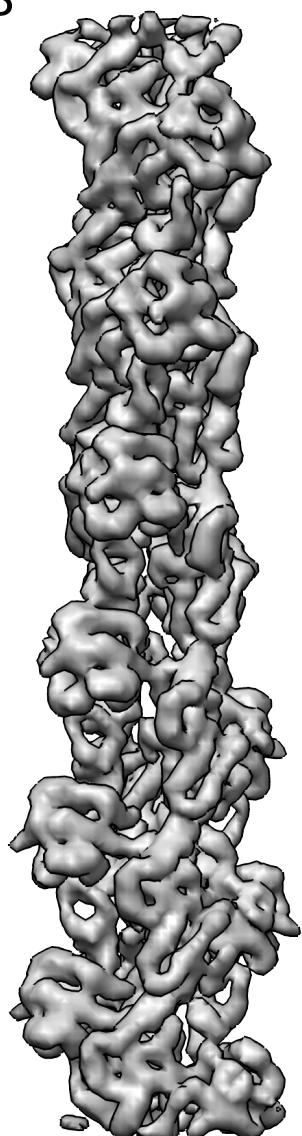**C**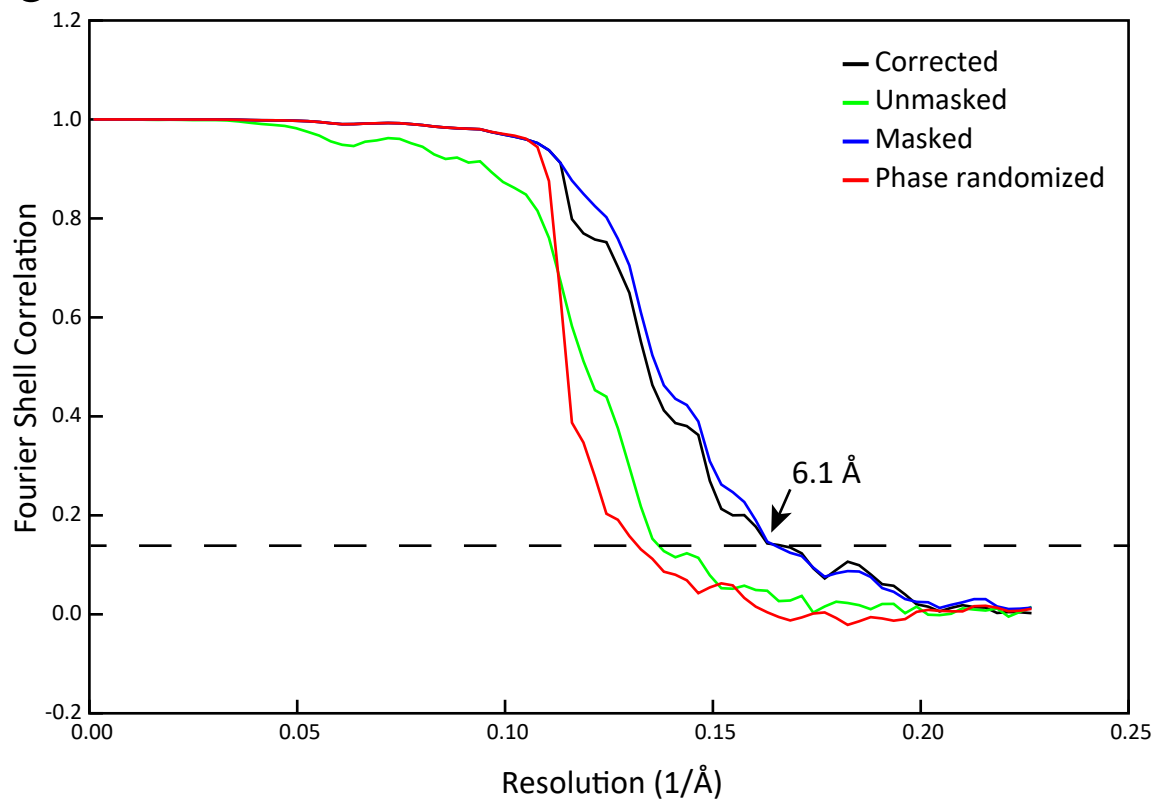

Supplement: supp [file elife_poa_e70307_Figure_1_figure_supplement_2.pdf › elife_poa_e70307_Figure_1_figure_supplement_2.pdf]

**A**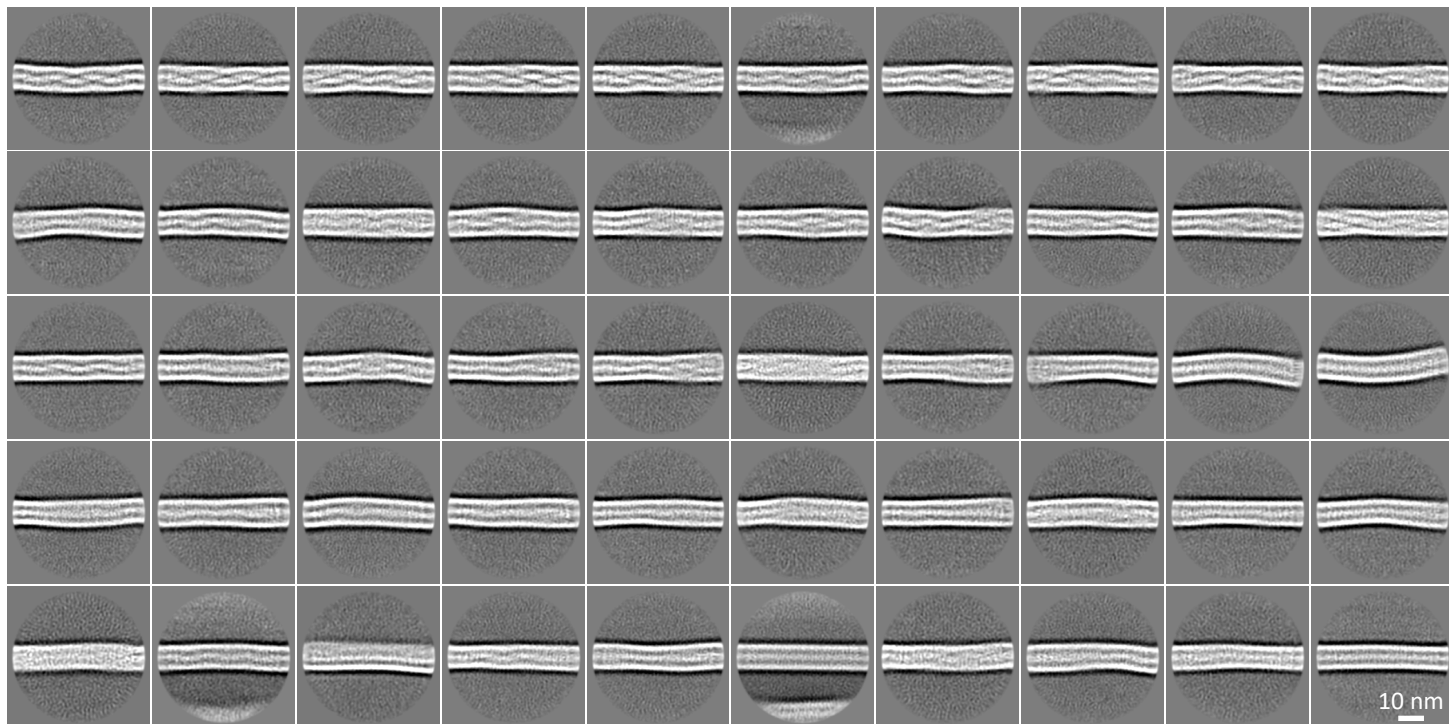**B**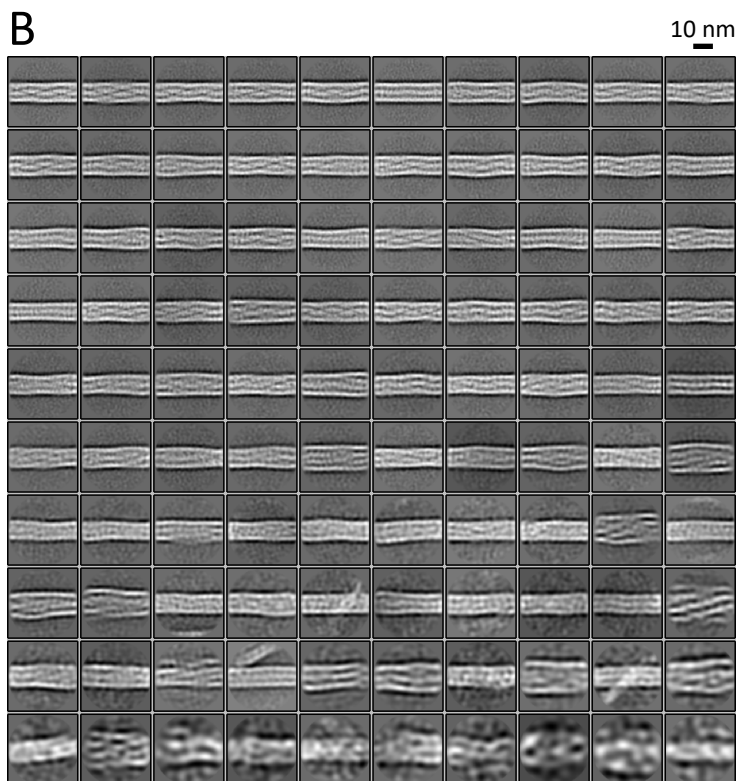**C**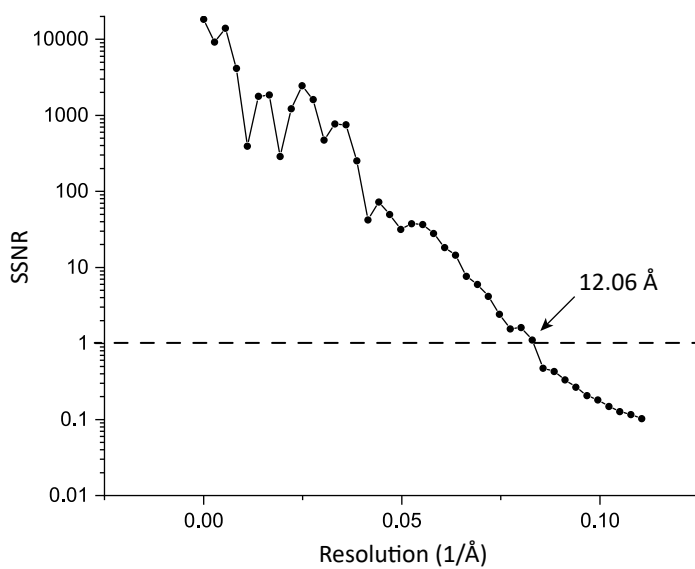**D**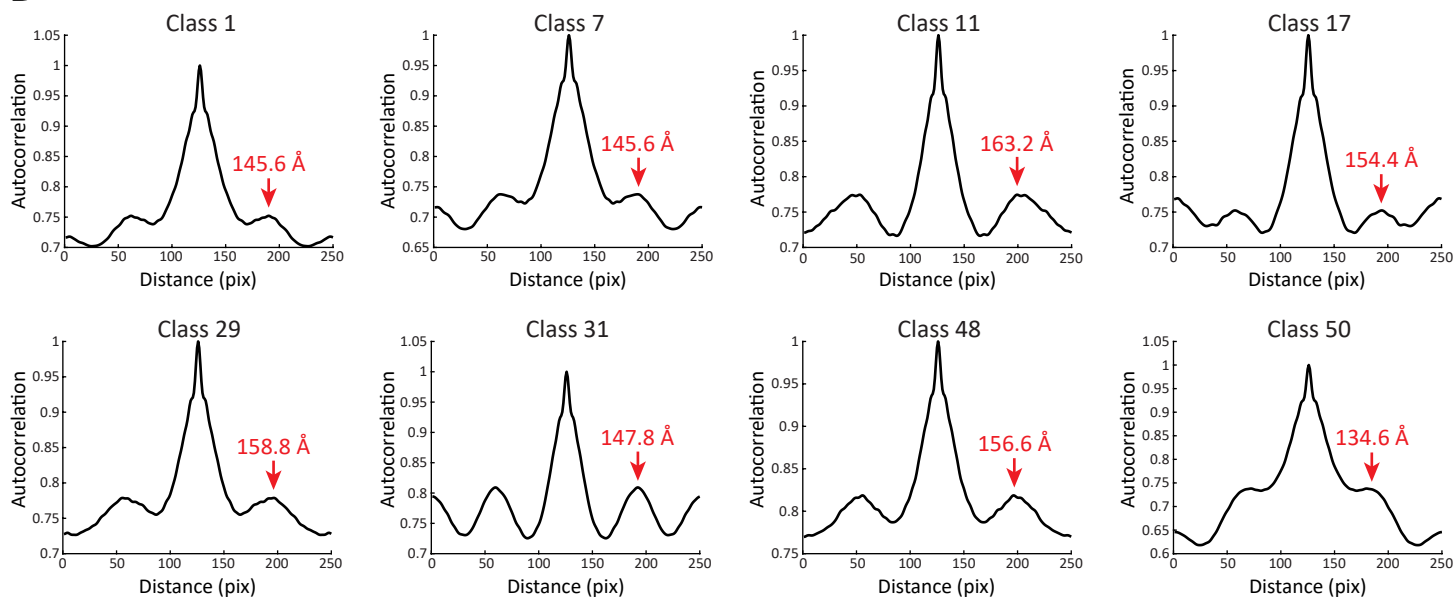

Supplement: supp [file elife_poa_e70307_Figure_2_figure_supplement_1.pdf › elife_poa_e70307_Figure_2_figure_supplement_1.pdf]

A

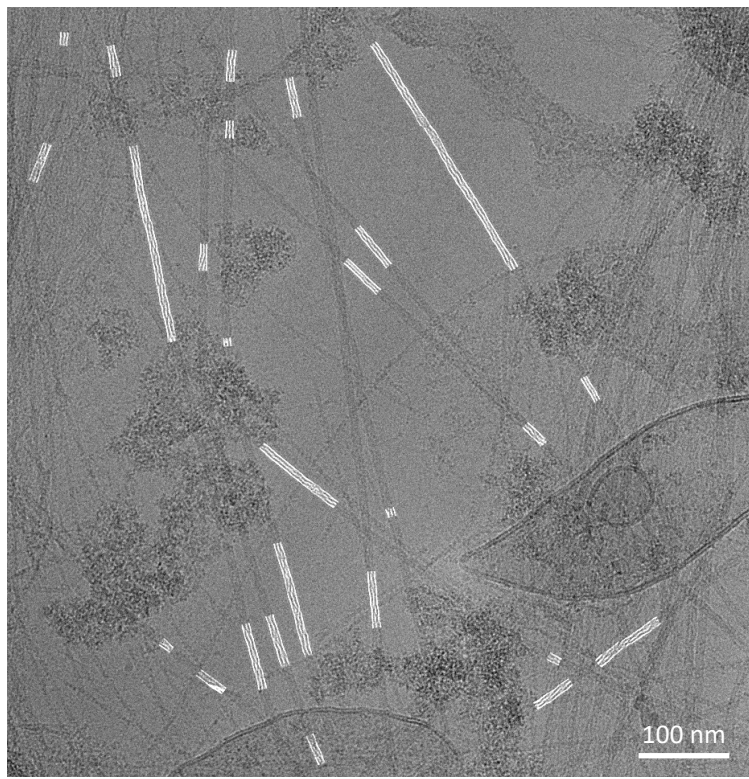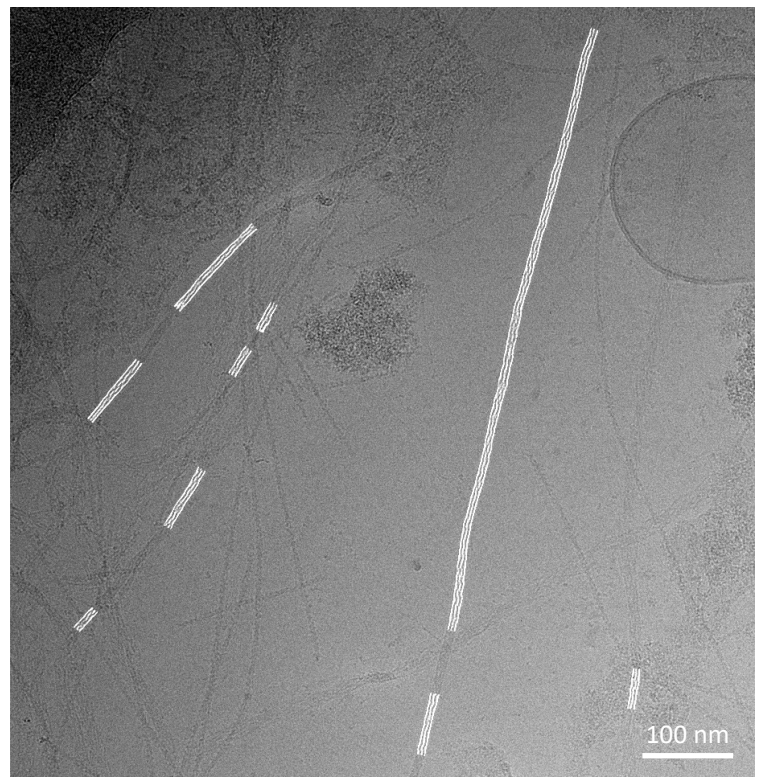

B

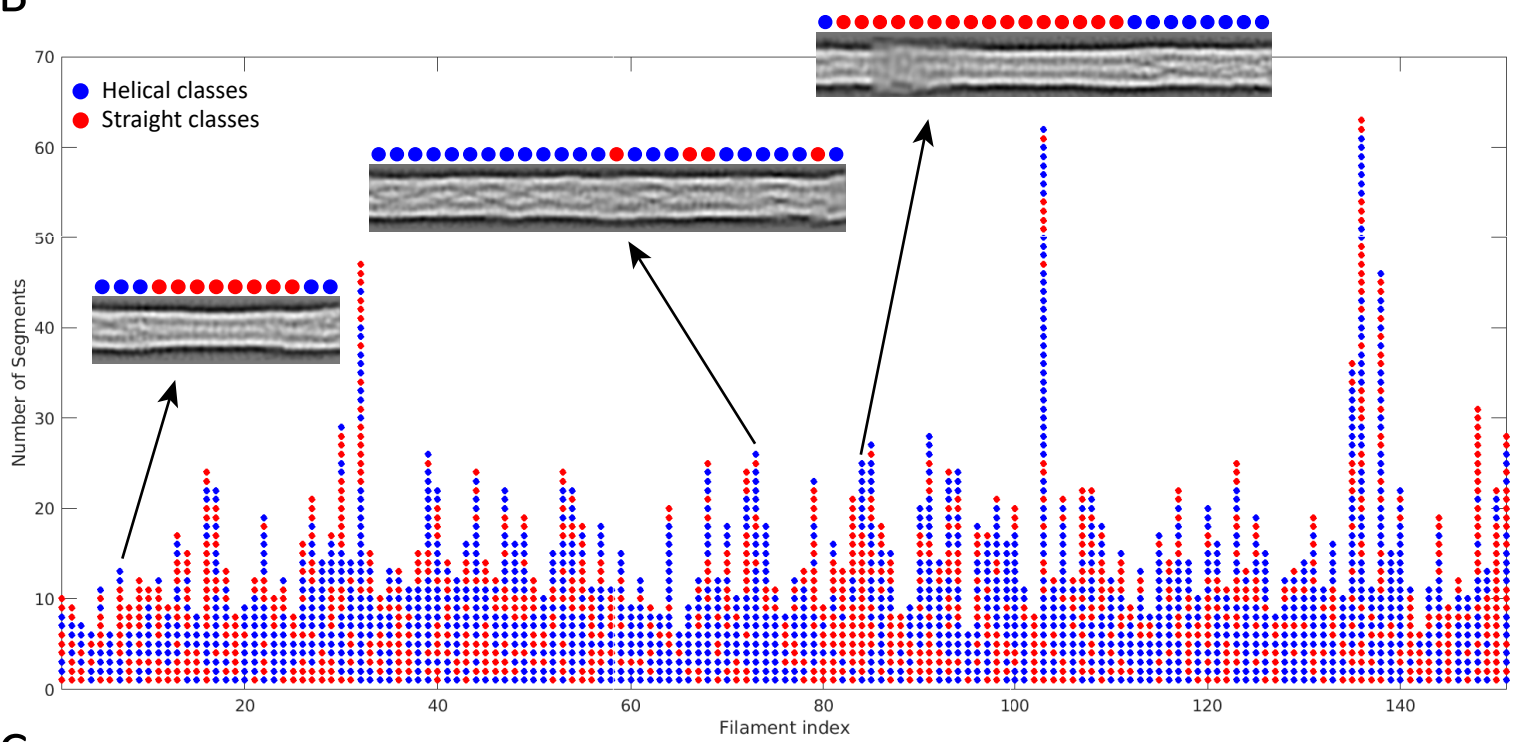

C

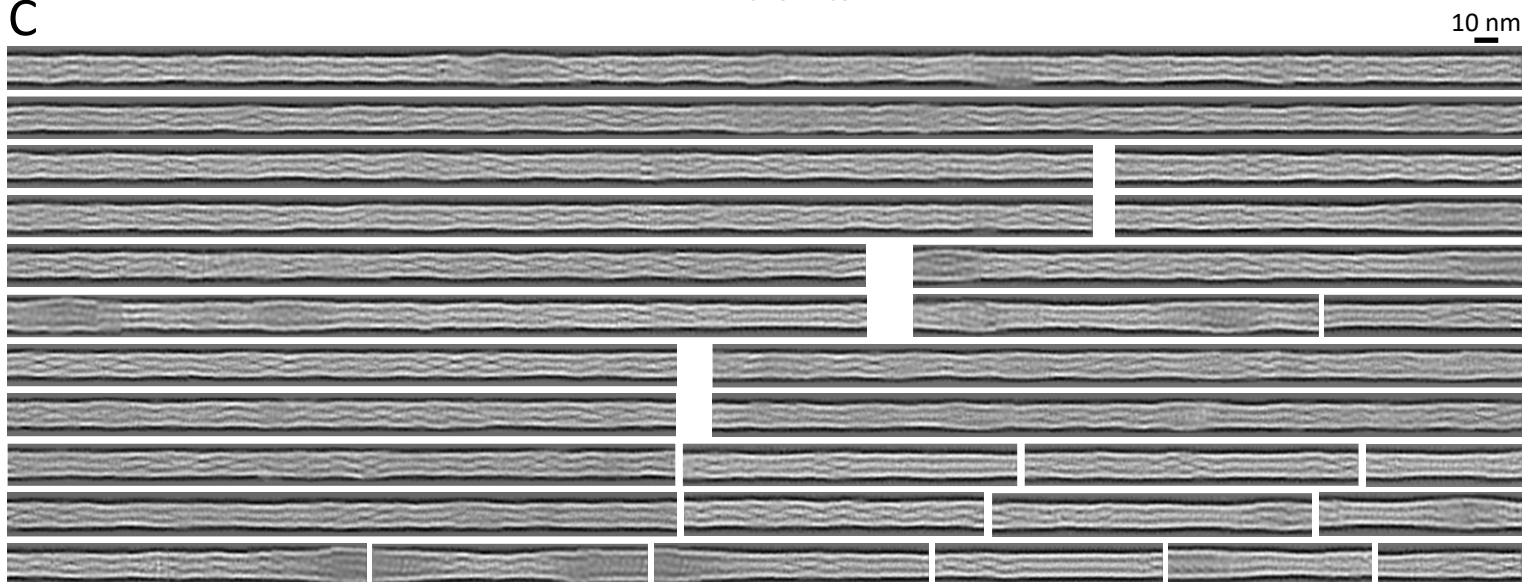

Supplement: supp [file elife_poa_e70307_Figure_3_figure_supplement_1.pdf › elife_poa_e70307_Figure_3_figure_supplement_1.pdf]

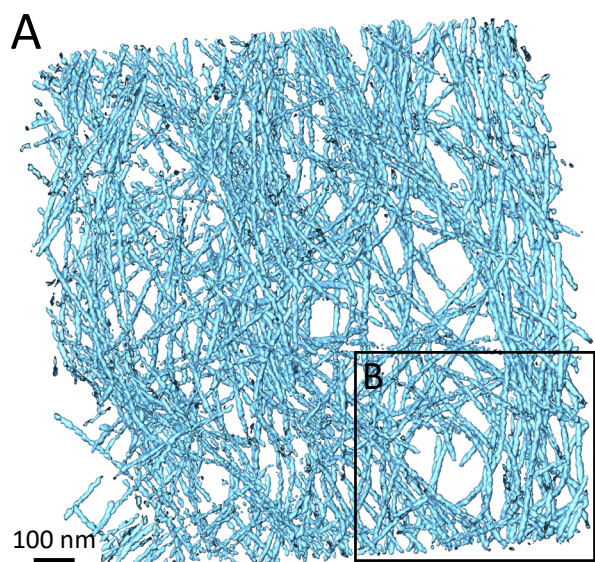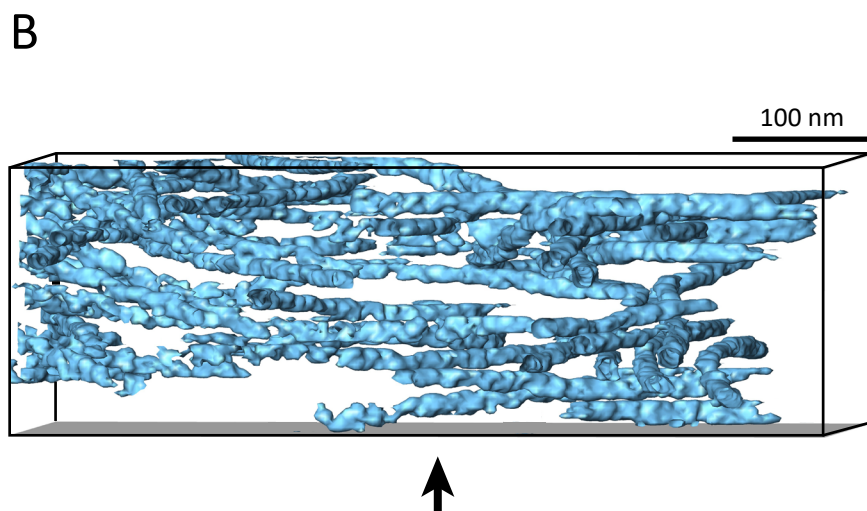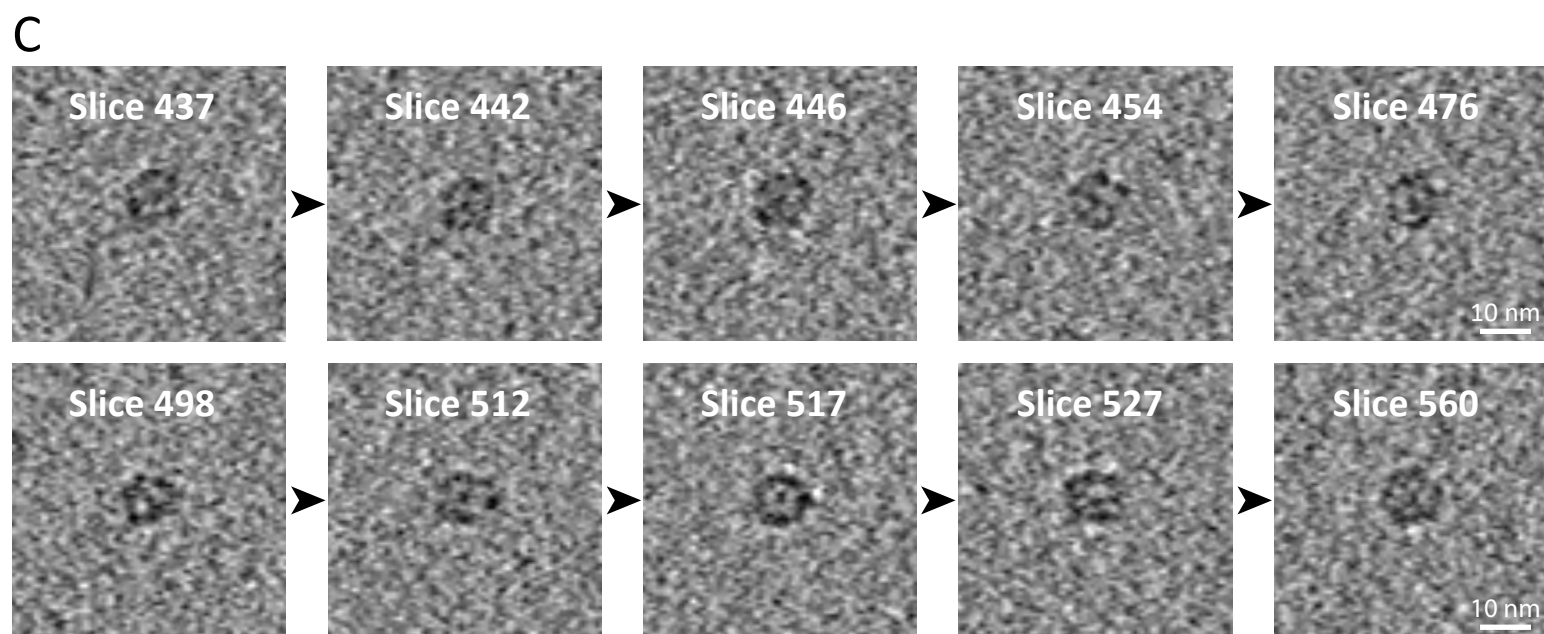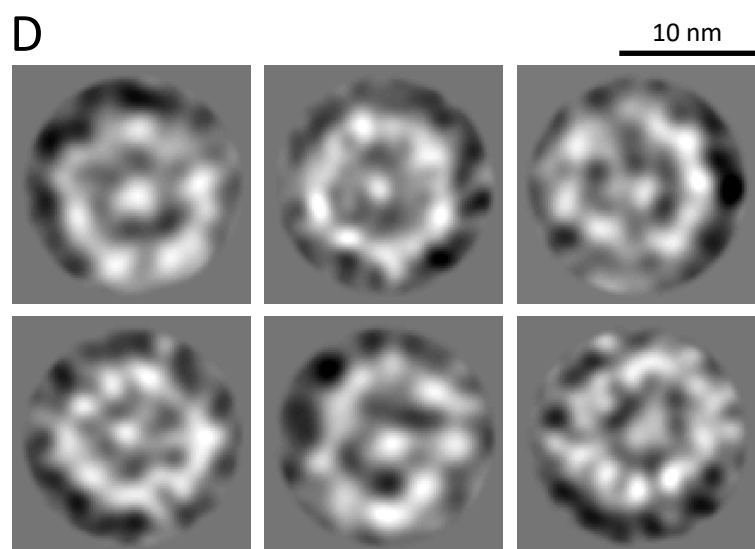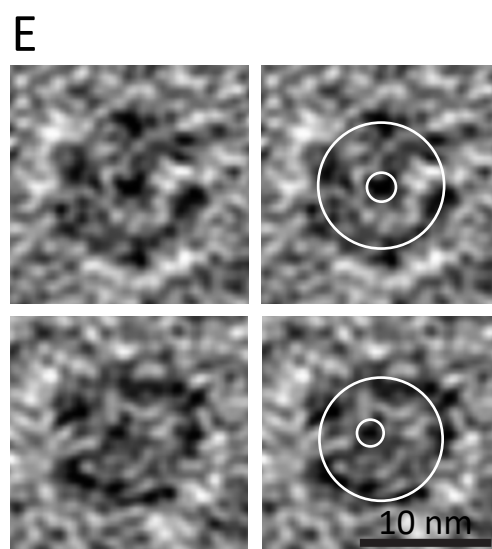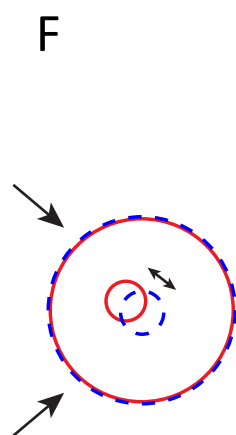

Supplement: supp [file elife_poa_e70307_Figure_4_figure_supplement_1.pdf › elife_poa_e70307_Figure_4_figure_supplement_1.pdf]
